# Supplementary material for: Retinoic Acid Maintains Function of Neural Crest–Derived Ocular and Craniofacial Structures in Adult Zebrafish
Source: PubMed Central journal article supplement — Invest Ophthalmol Vis Sci. 2018 Apr;59(5):1924–35. doi: 10.1167/iovs.17-22845 (PMC5894920; doi:10.1167/iovs.17-22845), 2018-04
Supplement: iovs-59-03-13_s11.pdf [file iovs-59-03-13_s11.pdf]

Supplemental Table 1: Quantitative RT-PCR Primer Sequences

| Gene           | Forward              | Reverse              |
|----------------|----------------------|----------------------|
| <i>raraa</i>   | ACTCTCAGCAGCTCCGTGAG | AGCTCCGGTTATTTAGTCTC |
| <i>rarab</i>   | AAAGGAGCTGGAGGAGGTGG | TCTCTGGCGCTGGTCGGCTG |
| <i>rarga</i>   | TTAGGTCTGTTACAACACGC | TCCTCTAGTCAGGATATACG |
| <i>myoc</i>    | CAACAGCTTCAGACCGGGAT | GCCATGCGGGGTCTCTTAAA |
| <i>pitx2a</i>  | GGGAGTAAACACGCGCCGCT | TGCGTTCGTTGCCGCCTTTG |
| <i>β-actin</i> | ACTACAGCGATGACGTAGGG | ACCAAGCCATGGAAGTCAGT |
